# Supplementary material
Source: publisher site journal article supplement (https://www.spandidos-publications.com/7208/downloadSupplementary)
Supplement: Supplementary file 1 [file downloadSupplementary]

Table SI. Meta-regression analysis results.

| Covariate        | Regression coefficient | SE   | 95% CI     | P-value |
|------------------|------------------------|------|------------|---------|
| Publication year | -0.12                  | 0.10 | -0.37-0.12 | 0.29    |
| Follow-up time   | -0.01                  | 0.01 | -0.03-0.01 | 0.58    |
| Analysis method  | 0.53                   | 0.67 | -1.20-2.27 | 0.63    |
| Treatment        | -0.28                  | 0.47 | -1.49-0.93 | 0.72    |
| Cancer type      | -0.29                  | 0.58 | -1.77-1.19 | 0.87    |
| Tumor stage      | 0.51                   | 0.29 | -0.23-1.26 | 0.17    |
| Ethnicity        | -0.60                  | 0.50 | -1.90-0.70 | 0.29    |

CI, confidence interval; SE, standard error of coefficient.
